# Supplementary material for: Silent peripheral neuropathy determined by high-resolution ultrasound among contacts of patients with Hansen's disease
Source: PubMed Central journal article supplement (PMC9887334; doi:10.3389/fmed.2022.1059448), 2023-01-17

# Median Nerve Fibular Common nerve HHCs - Frontiers

Silent peripheral neuropathy among contacts of Hansen's disease patients by high-resolution ultrasound.

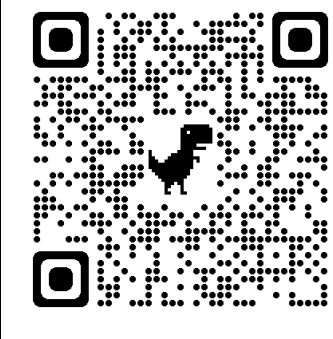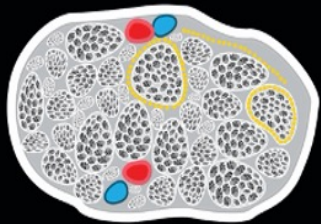

**Pattern A** or healthy "honey-comb".

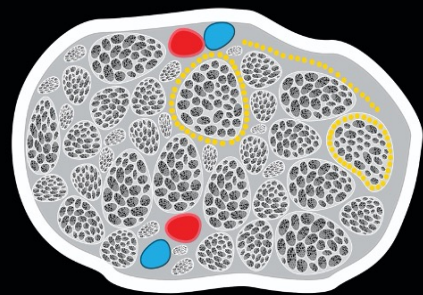

**Pattern B** or thickened

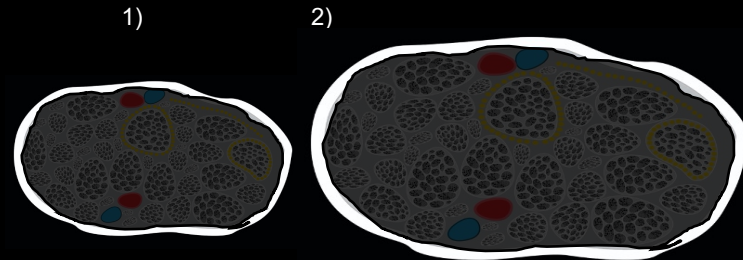

**Pattern C:**  
1) hypoechoic without enlargement ;  
2) hypoechoic with enlargement

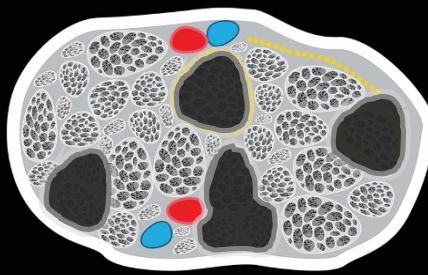

**Pattern D** ou Scolard modified by Voltan, G and Frade, MCF: thickened with hypoechoic focal distention of fascicles.

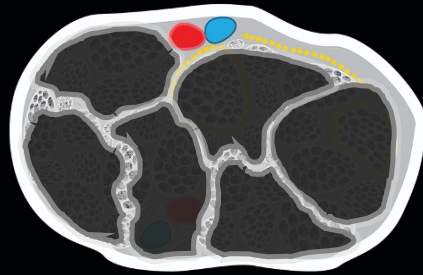

**Pattern E:** thickened with diffuse hypoechoic distention of fascicles.

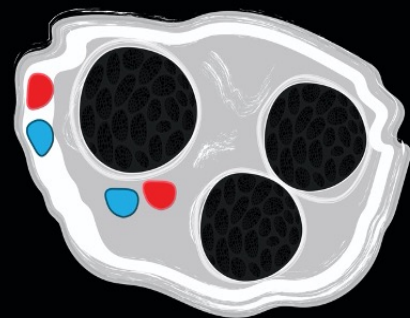

**Pattern F:** thickened, heterogeneous with thickening of the perineurium and epineurium and distention of fascicles

**ORIGINAL RESEARCH** article  
Front. Med., 09 September 2022  
Sec. Dermatology  
<https://doi.org/10.3389/fmed.2022.985252>

Man, 42 years, HHC without clinical neuropathy.

Left and Right CSA  $\rightarrow$   $>$  UPL (18,3 mm<sup>2</sup>)

$\Delta$ CSA = 22,51 - 19,59 = 2,92 mm<sup>2</sup>  $\rightarrow$   $>$  ULV (2,5 mm<sup>2</sup>)

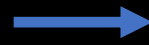

HRUS report: asymmetrical mononeuropathy.

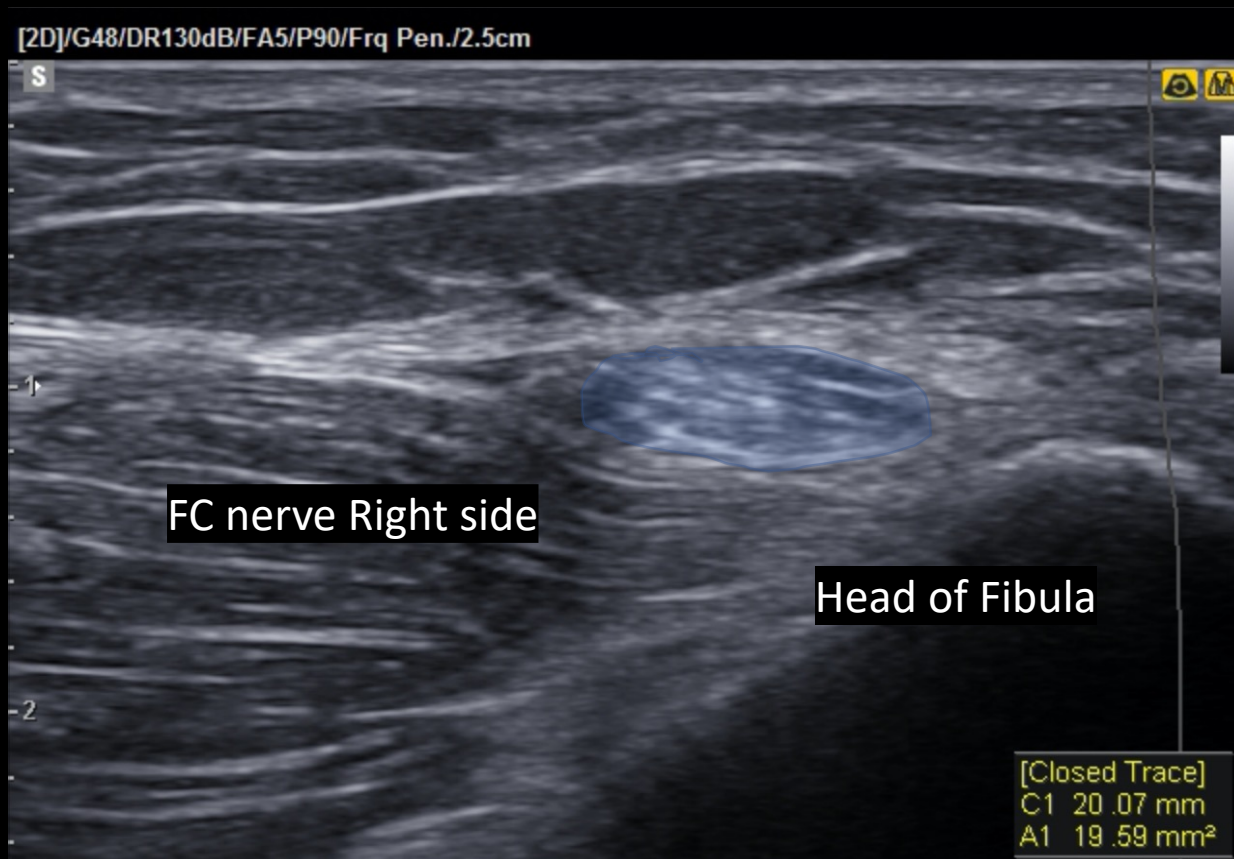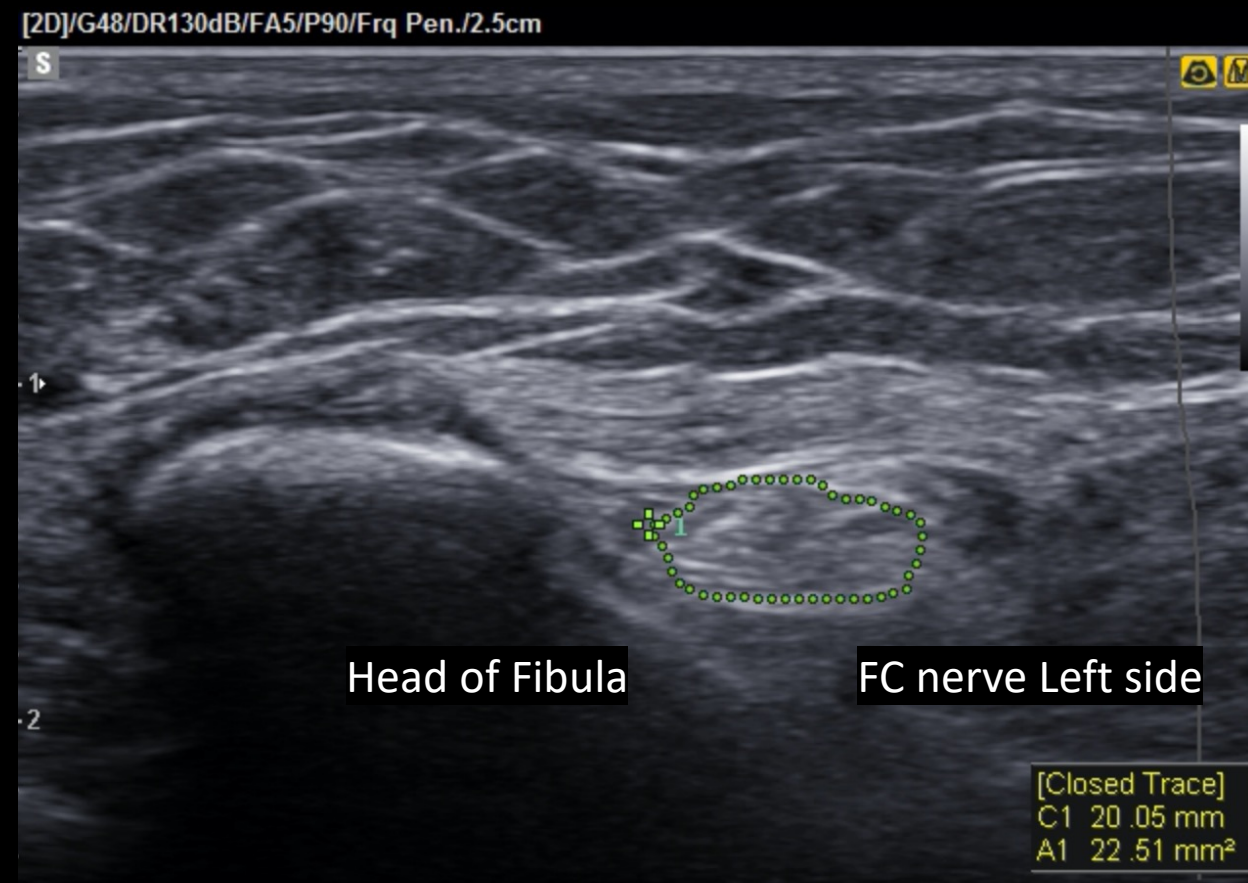

## Right - Fibular common Nerve

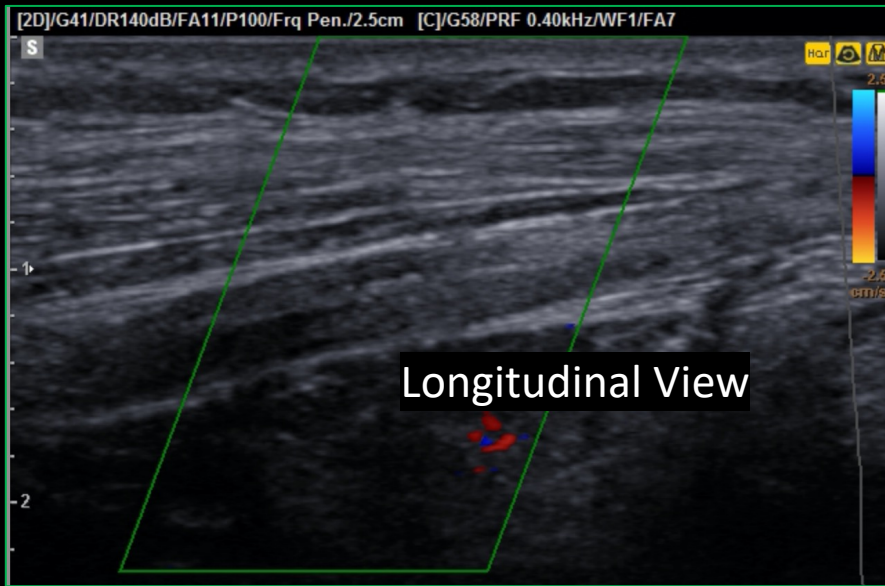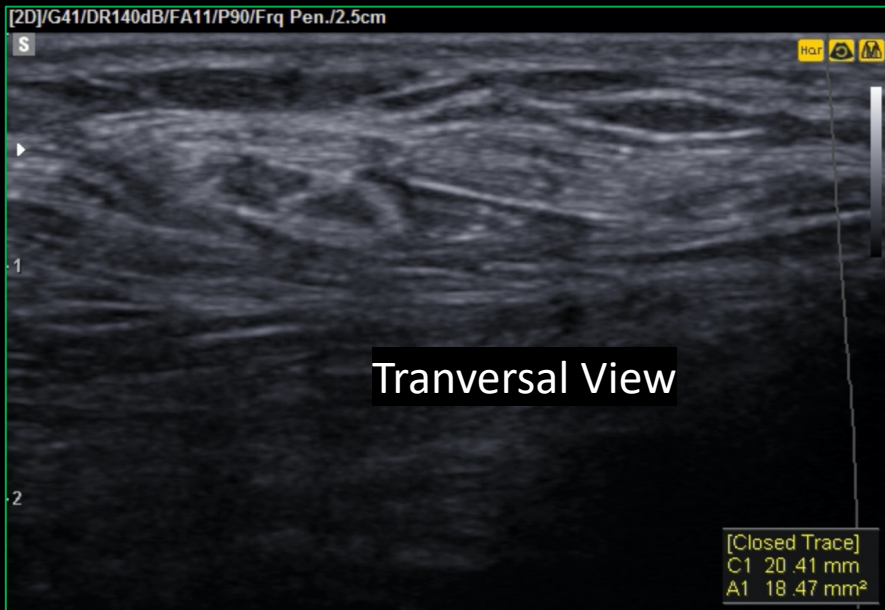

## Left - Fibular common Nerve

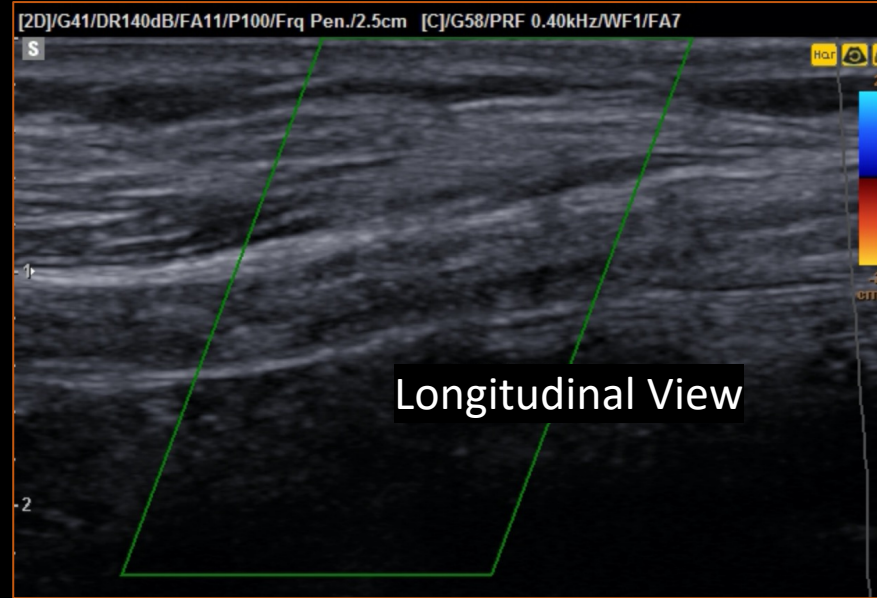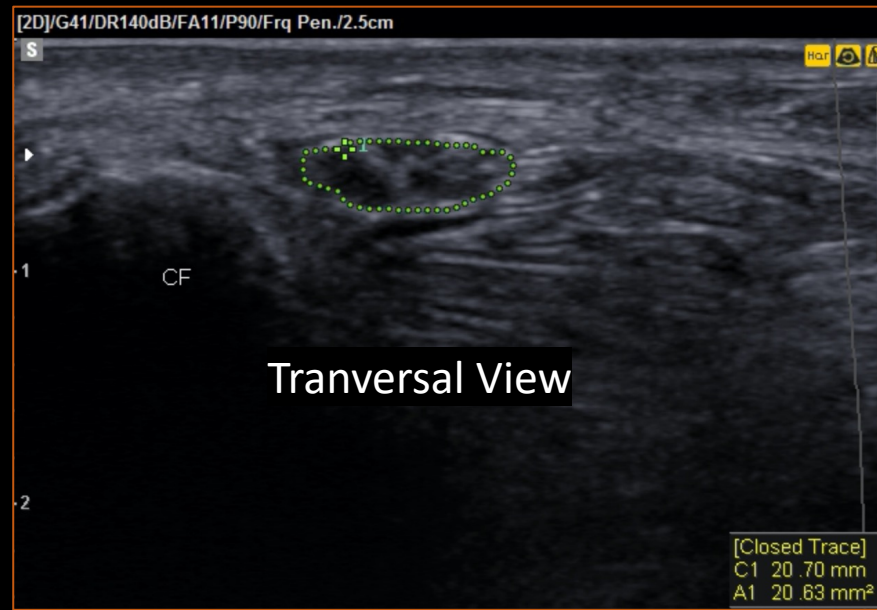

Man, 57 years,  
household contact of  
HD-patient, without  
clinical neuropathy.

Left and Right CSA →  
> UPL (18,3 mm<sup>2</sup>)

$\Delta\text{CSA} = 20,63 - 18,47 = 2,2\text{mm}^2$   
< ULV (2,5 mm<sup>2</sup>)

Woman, 38years, HHC without clinical neuropathy. → HRUS report: **mononeuropathy**.

Fibular commun nerve with enlargement (CSA → > UPL 18,3 mm<sup>2</sup>) in two points (proximal of fibular head and fibular head.  $\Delta Tpt = 24,41 - 22,78 = 1,63 \text{ mm}^2 \rightarrow < \text{ULV} (2,5 \text{ mm}^2)$ )

[2D]/G41/DR107dB/FA11/P95/Frq Pen./4.0cm

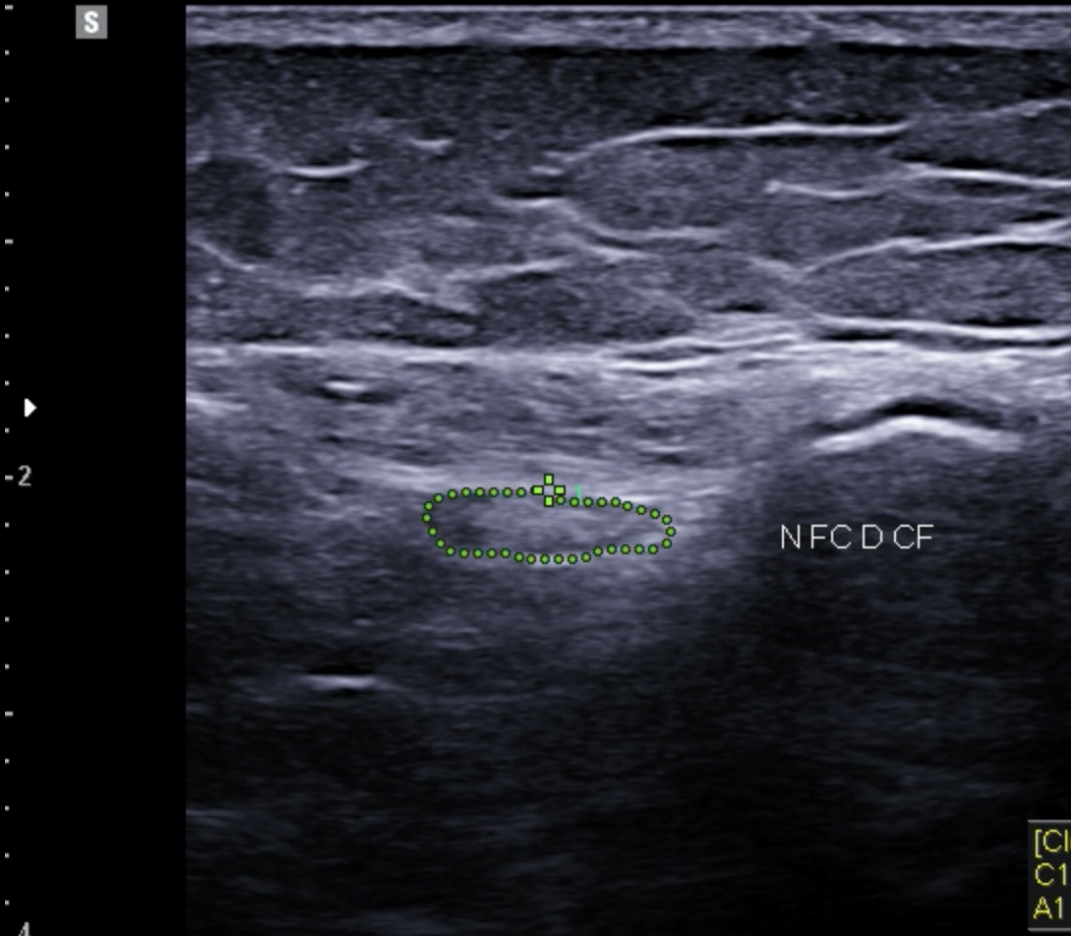

[2D]/G37/DR107dB/FA11/P95/Frq Pen./4.0cm

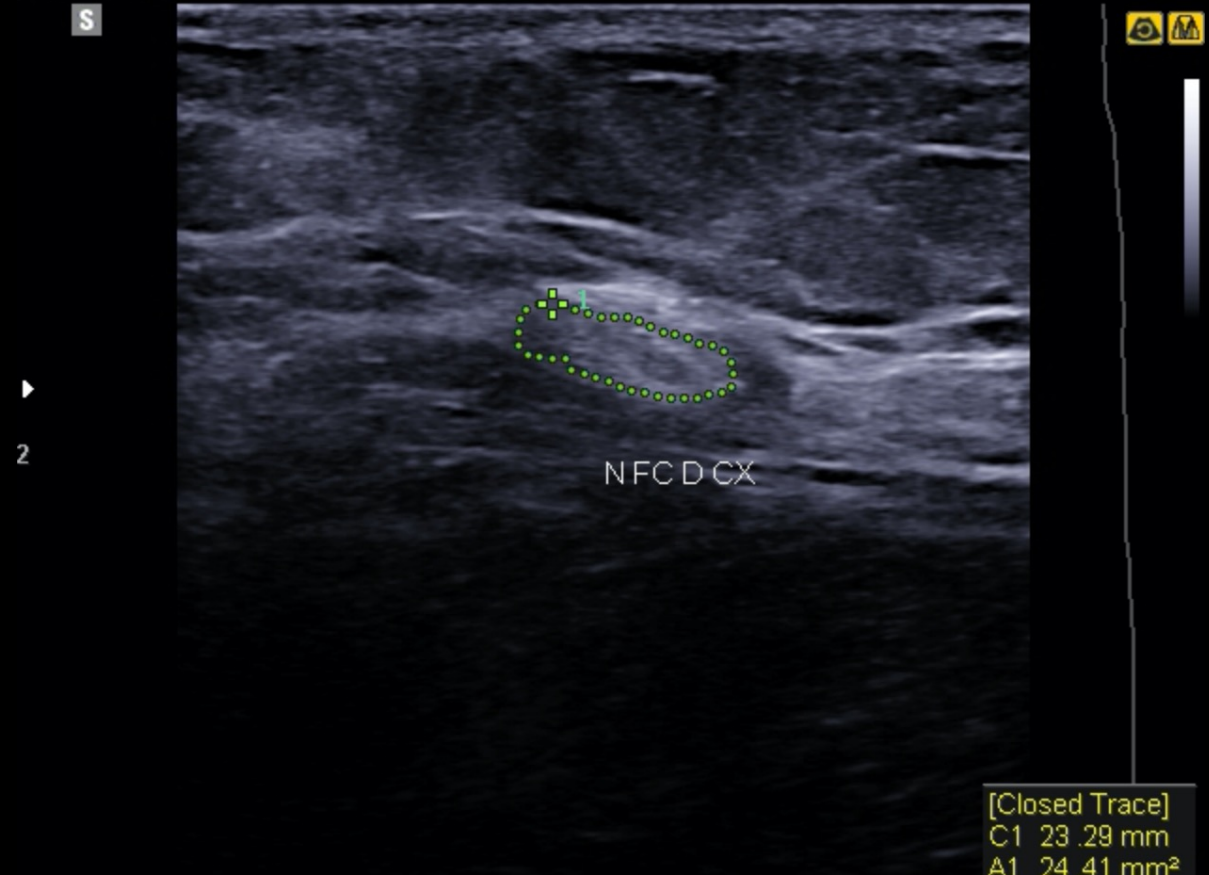

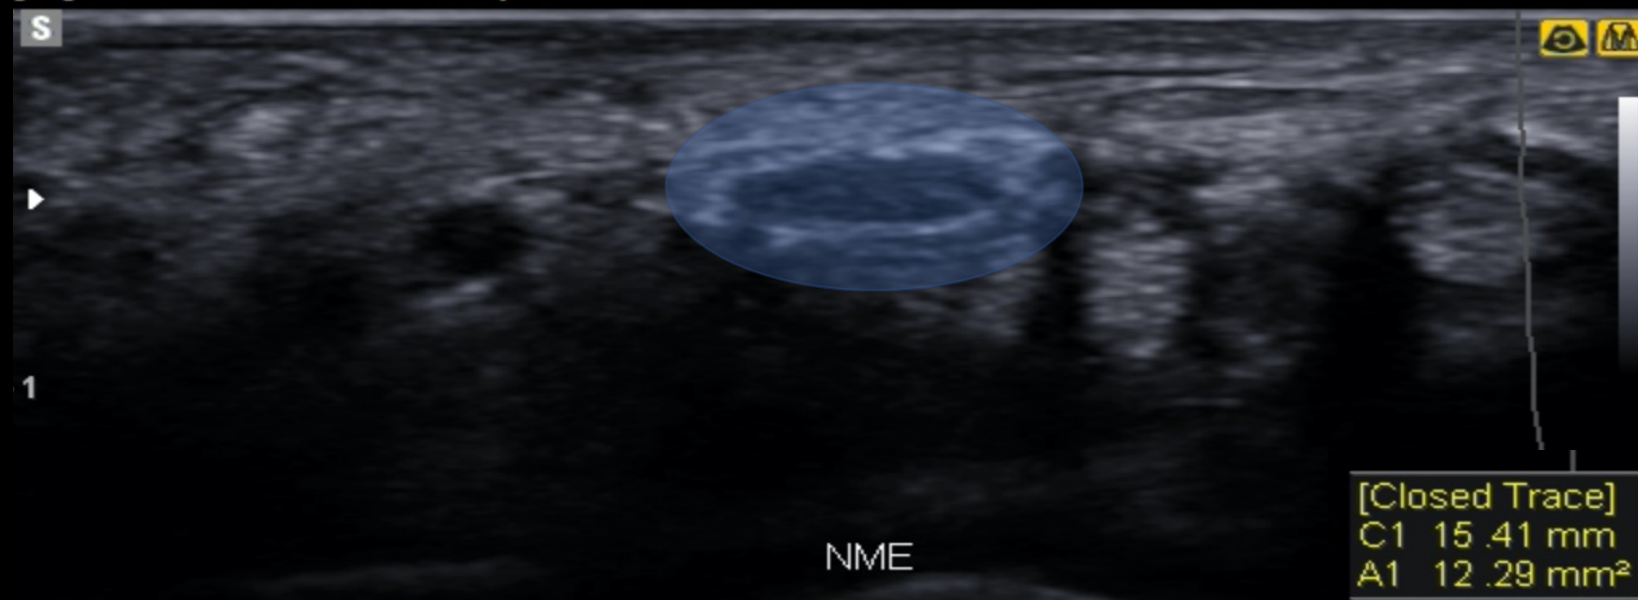

Woman with 36 years, contact of HD-patient. Fusiform enlargement of left median nerve highlight to proximal carpal tunnel with major CSA;  $\Delta T_{pT} = 15,47 - 12,29 = 3,2$  mm<sup>2</sup> > ULV

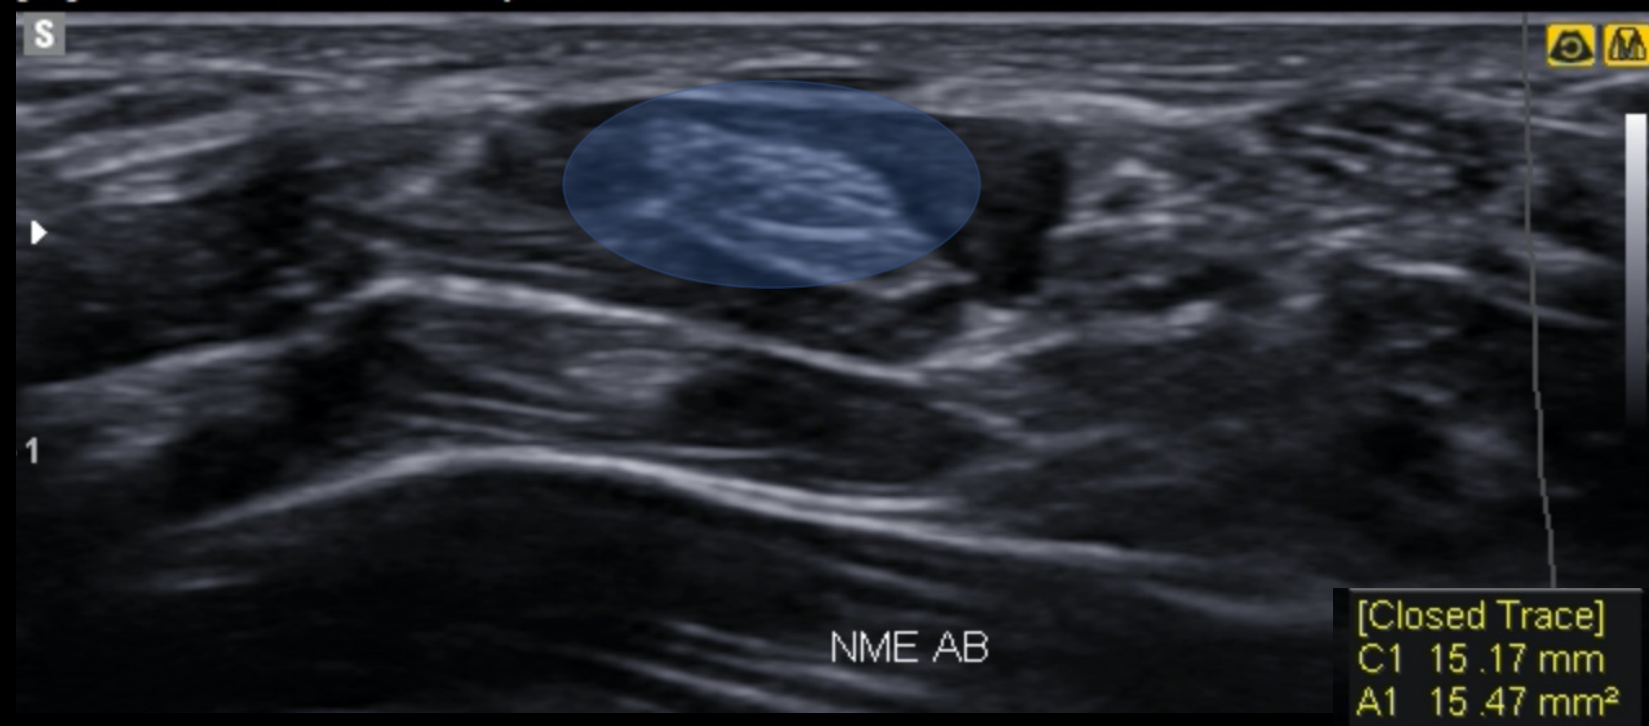

[2D]/G50/DR140dB/FA11/P90/Frq Pen./3.0cm

S

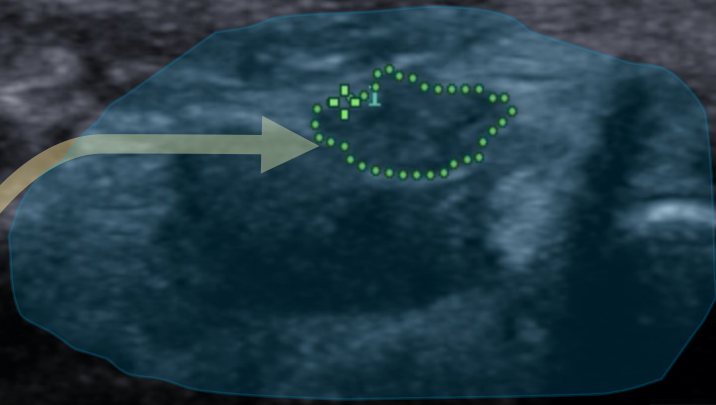

Left Median nerve CT

[Closed Trace]  
C1 17.32 mm  
A1 14.95 mm<sup>2</sup>

[2D]/G50/DR140dB/FA11/P90/Frq Pen./3.0cm

S

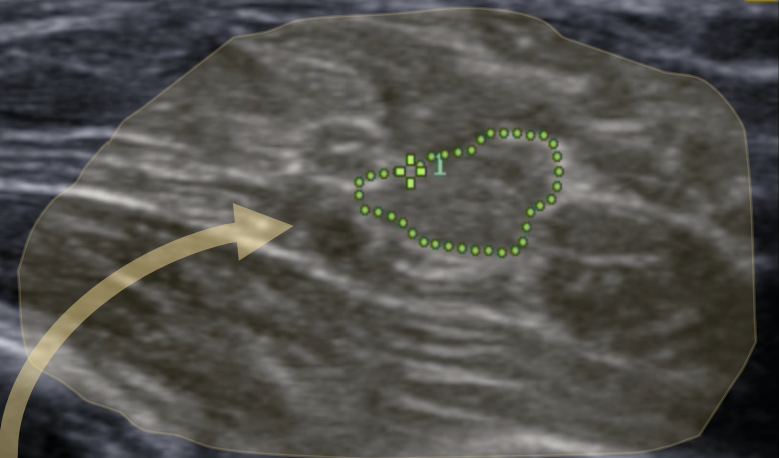

Left Median nerve proximal of CT

[Closed Trace]  
C1 18.94 mm  
A1 18.69 mm<sup>2</sup>

[2D]/G50/DR140dB/FA11/P90/Frq Pen./3.0cm

S

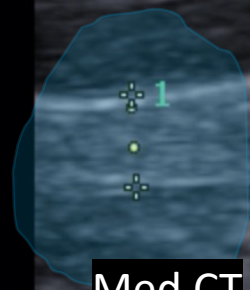

Med CT

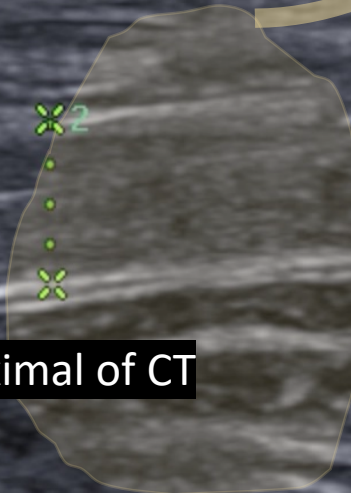

proximal of CT

[Straight Distance]  
D1 2.57 mm  
[Straight Distance]  
D2 4.58 mm

Man, 57 years, household contact of HD-patient, without clinical neuropathy.

[2D]/G47/DR107dB/FA11/P95/Frq Gen./3.0cm

S

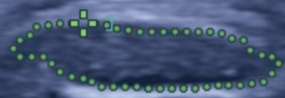

NM D  
CT

G42/DR107dB/FA11/P95/Frq Gen./3.0cm

[Closed Trace]  
C1 21.92 mm  
A1 17.25 mm<sup>2</sup>

NM D

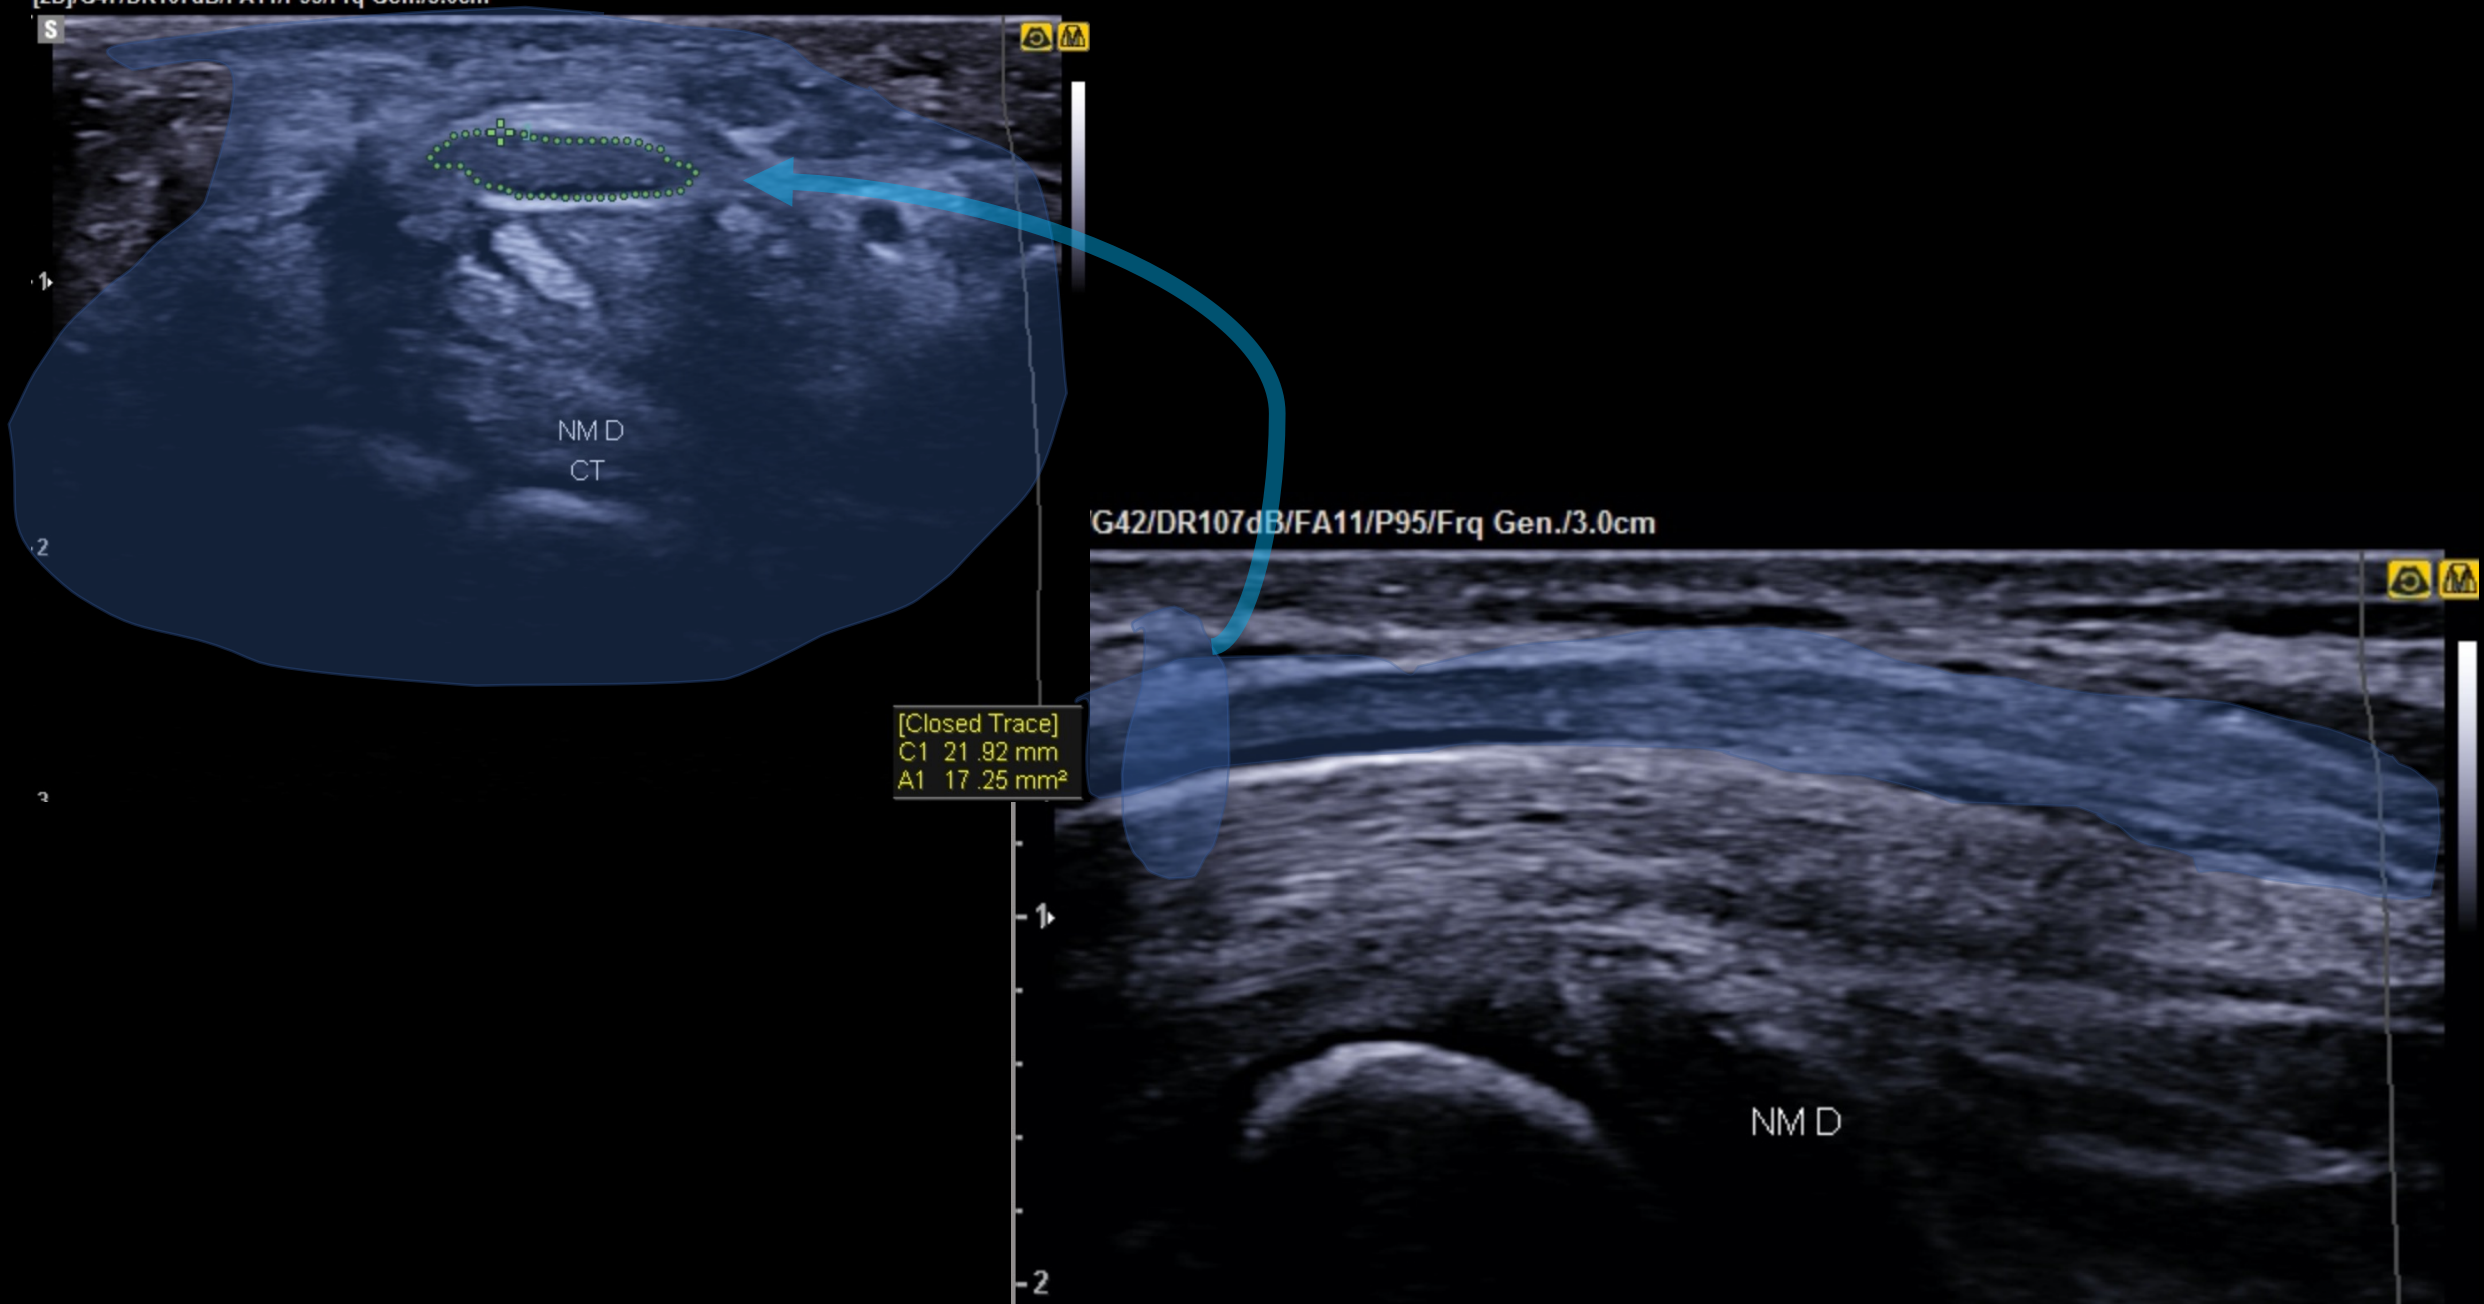



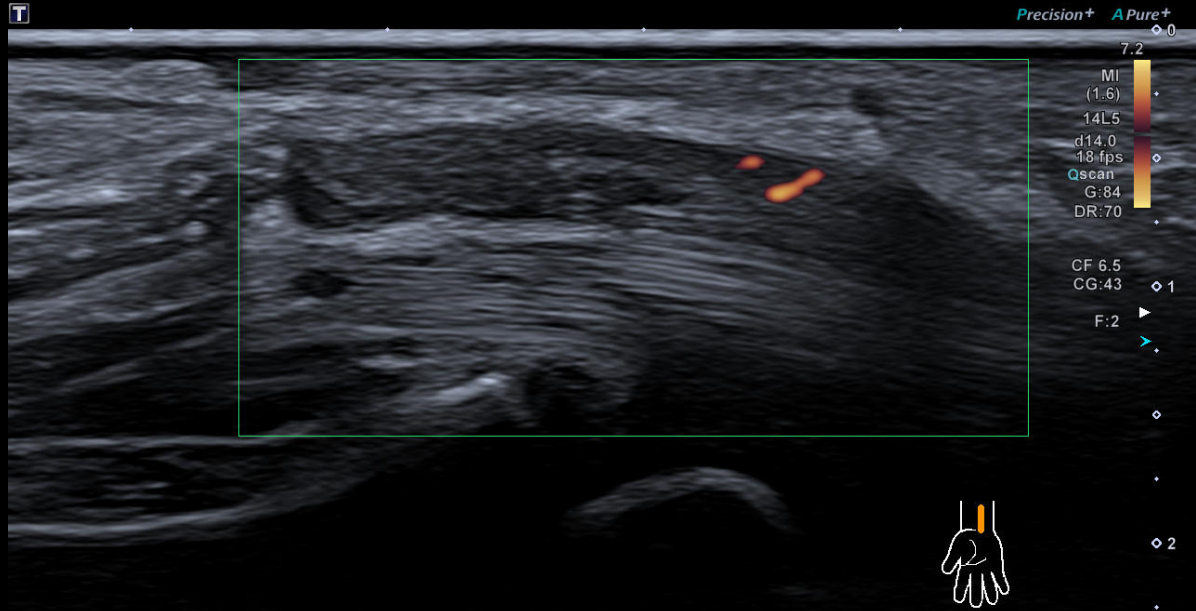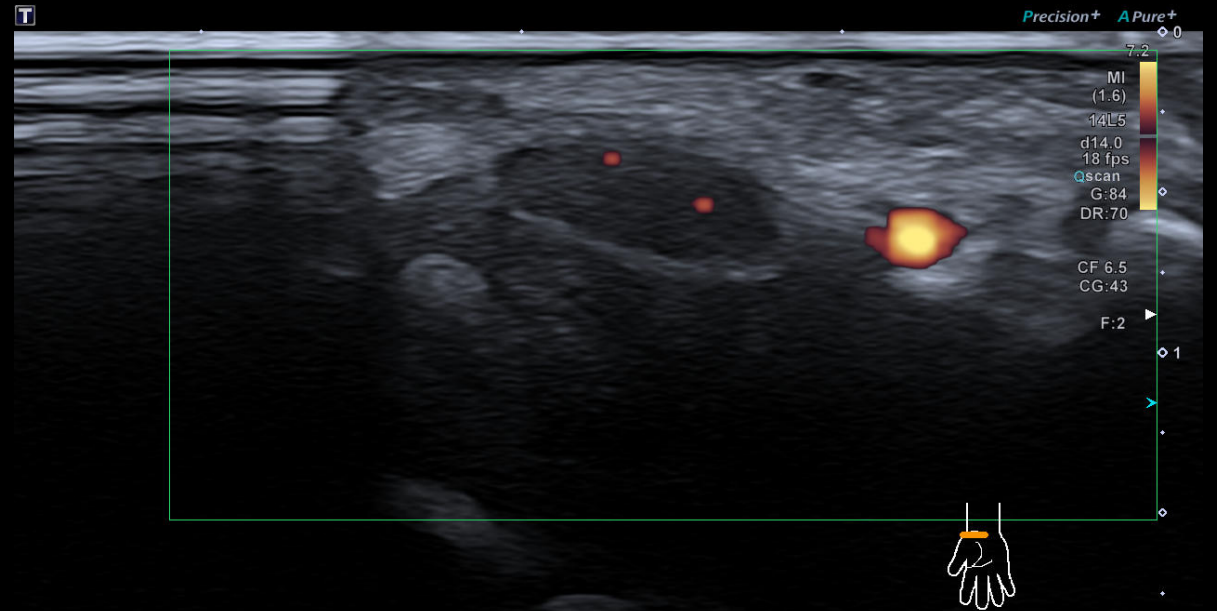

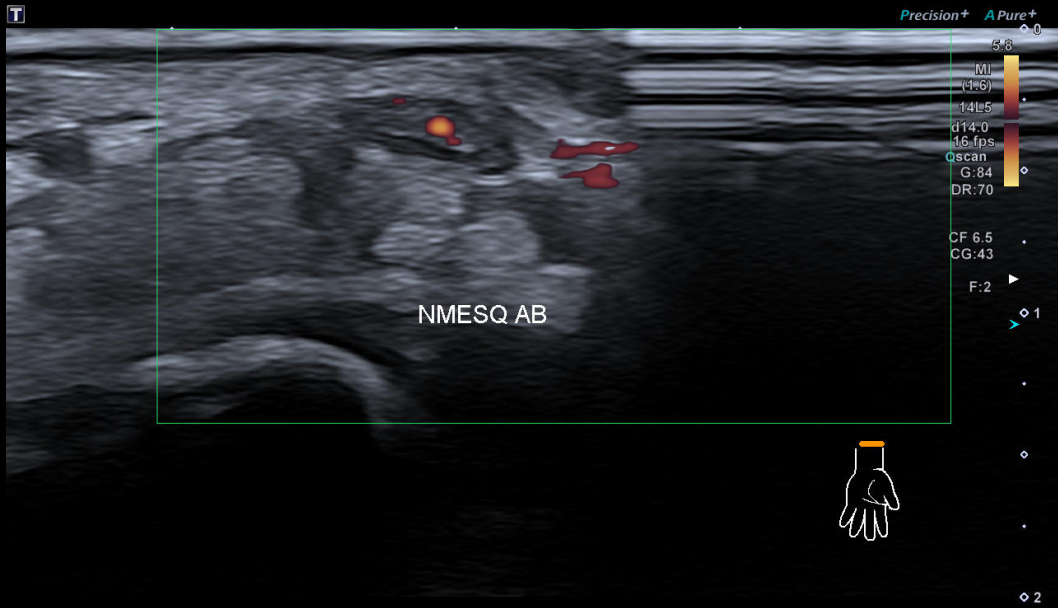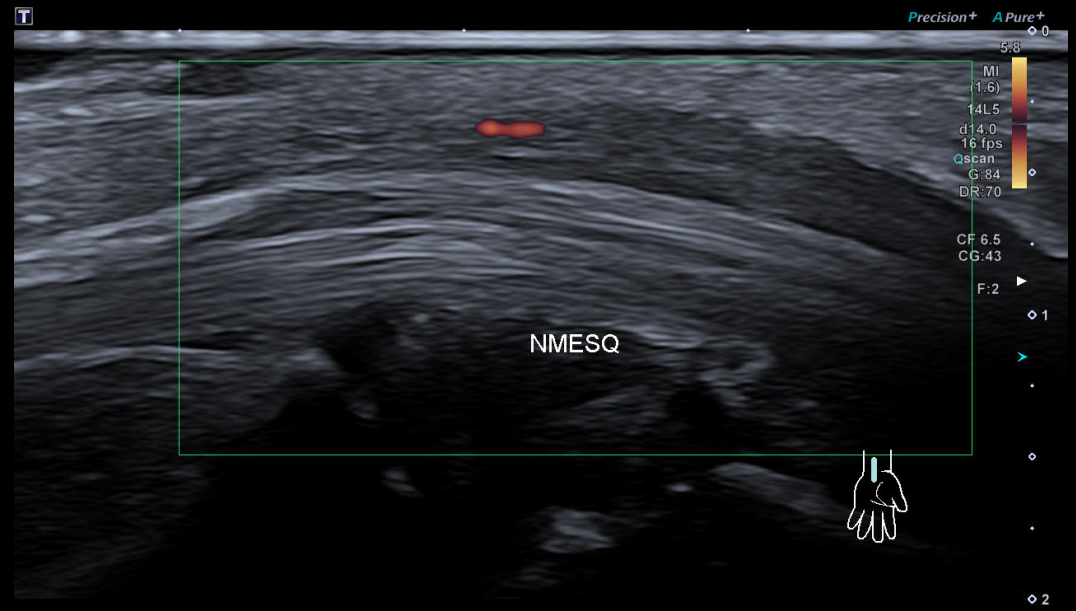

Pattern B or Thickened CSA > VR + 2 SD

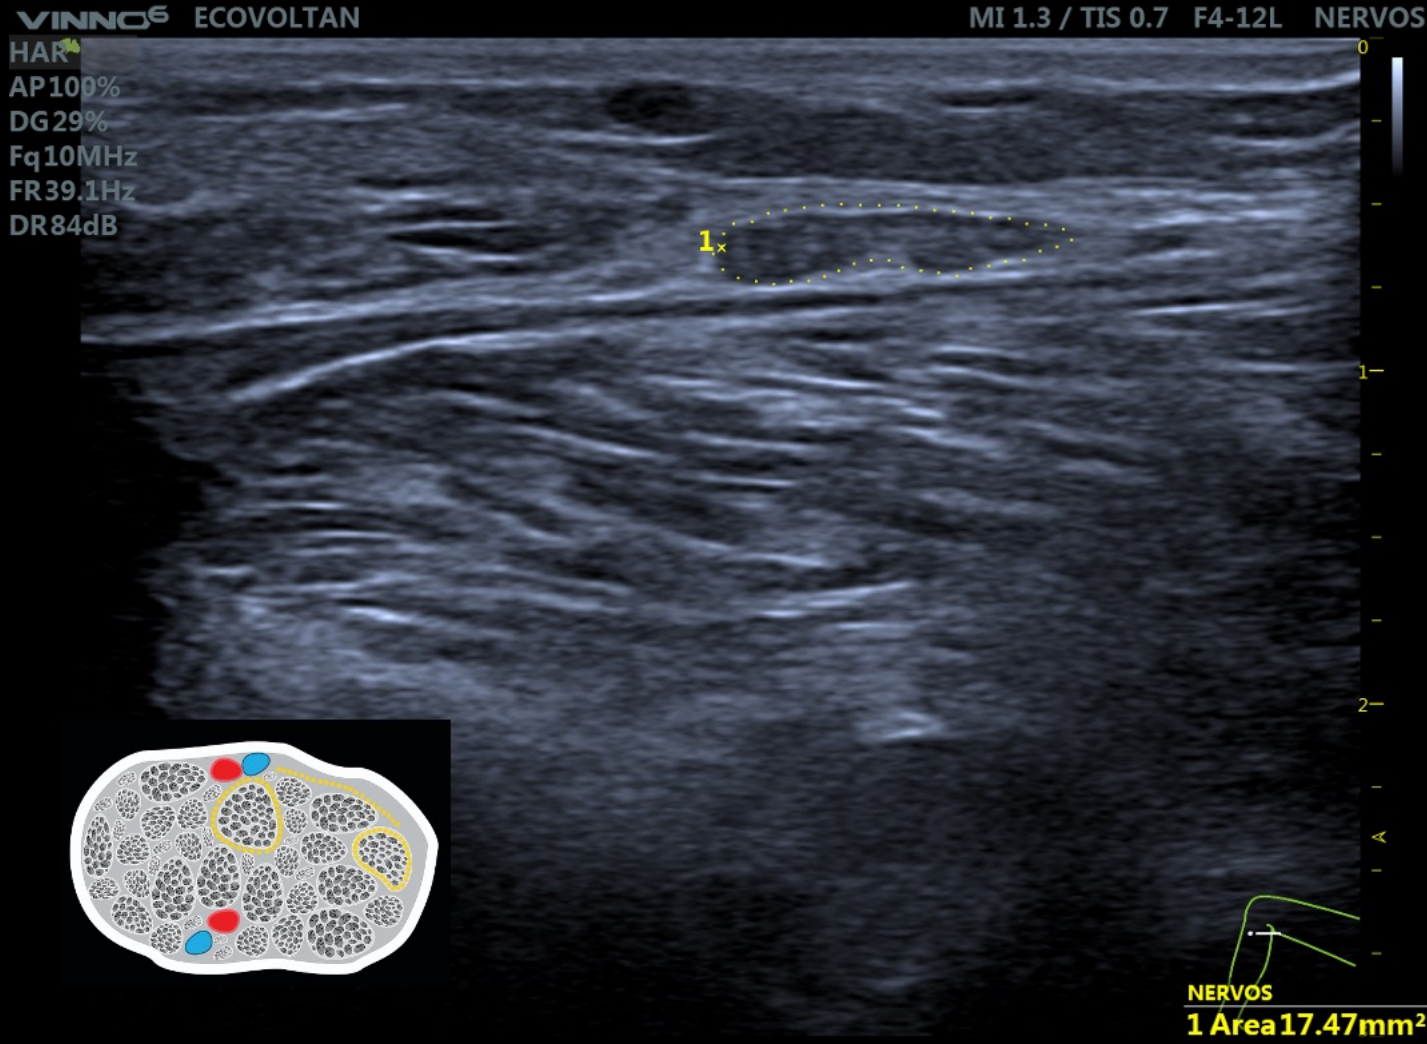

# Pattern C or Hypoechoic (CSA < VR + 2 SD)

VINNO<sup>6</sup> ECOVOLTAN

MI 1.3 / TIS 0.7 F4-12L NERVOS

HAR  
AP100%  
DG20%  
Fq 10MHz  
FR39.1Hz  
DR84dB

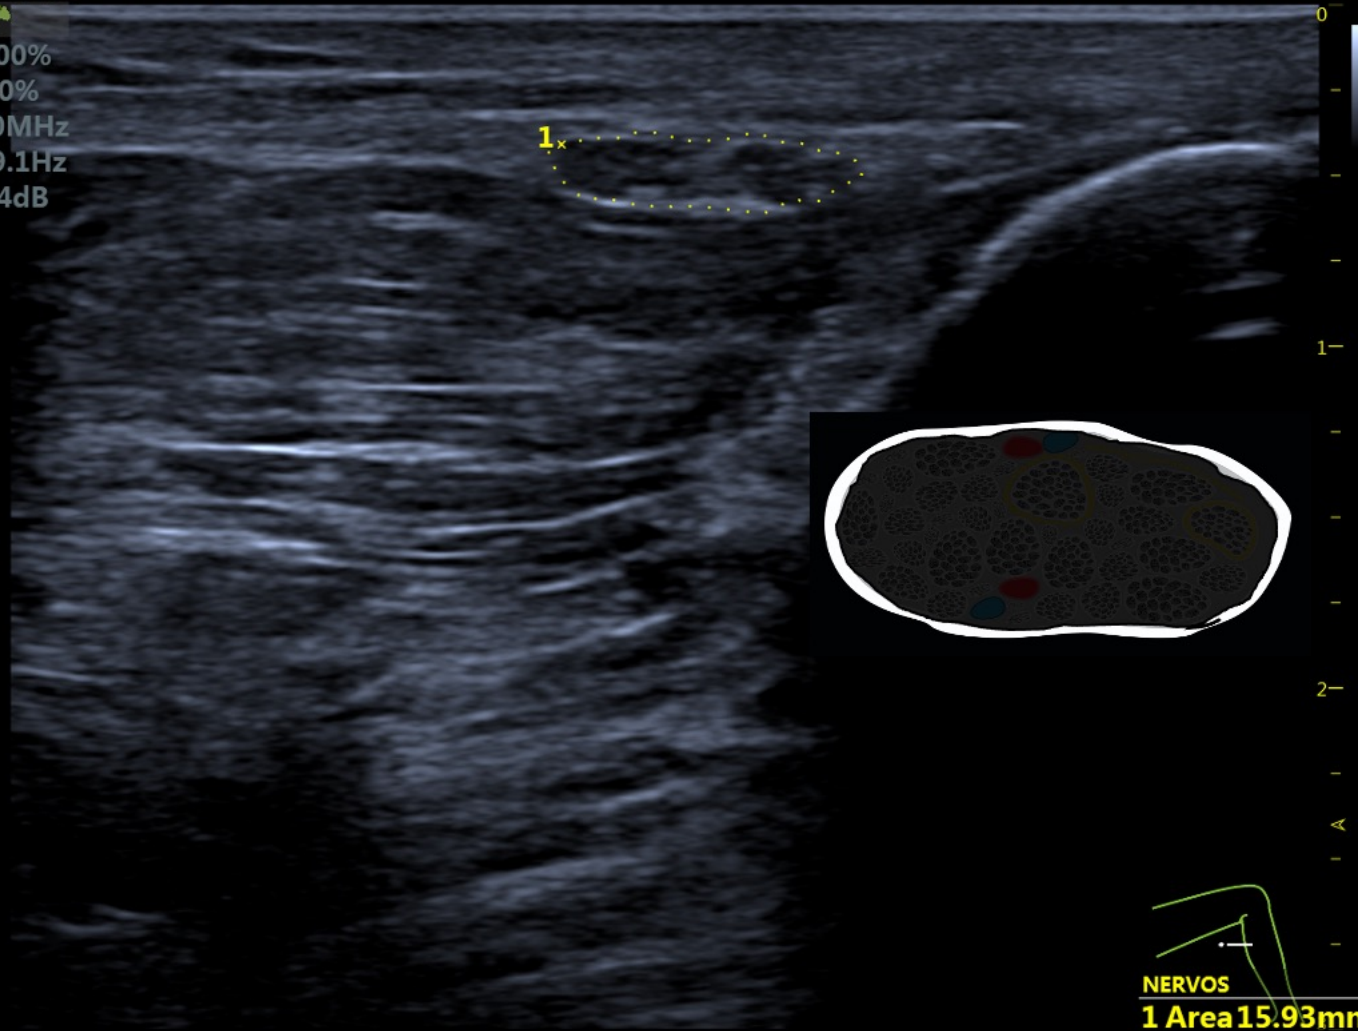

NERVOS  
1 Area 15.93mm<sup>2</sup>

# Pattern B + C or Enlargement + Hypoechoic

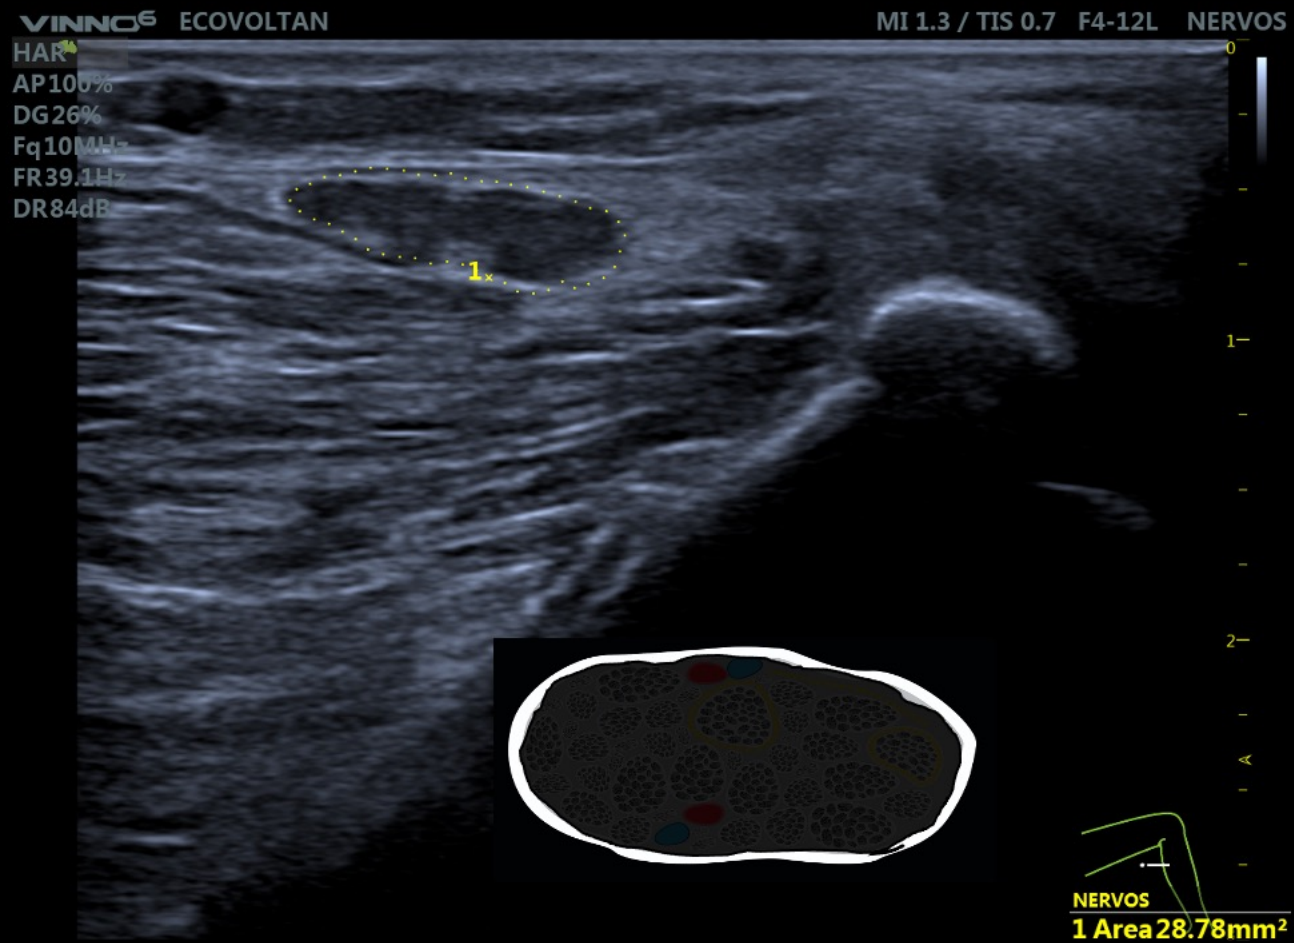

Pattern D or Focal fascicle distension (CSA < VR + 2 SD)

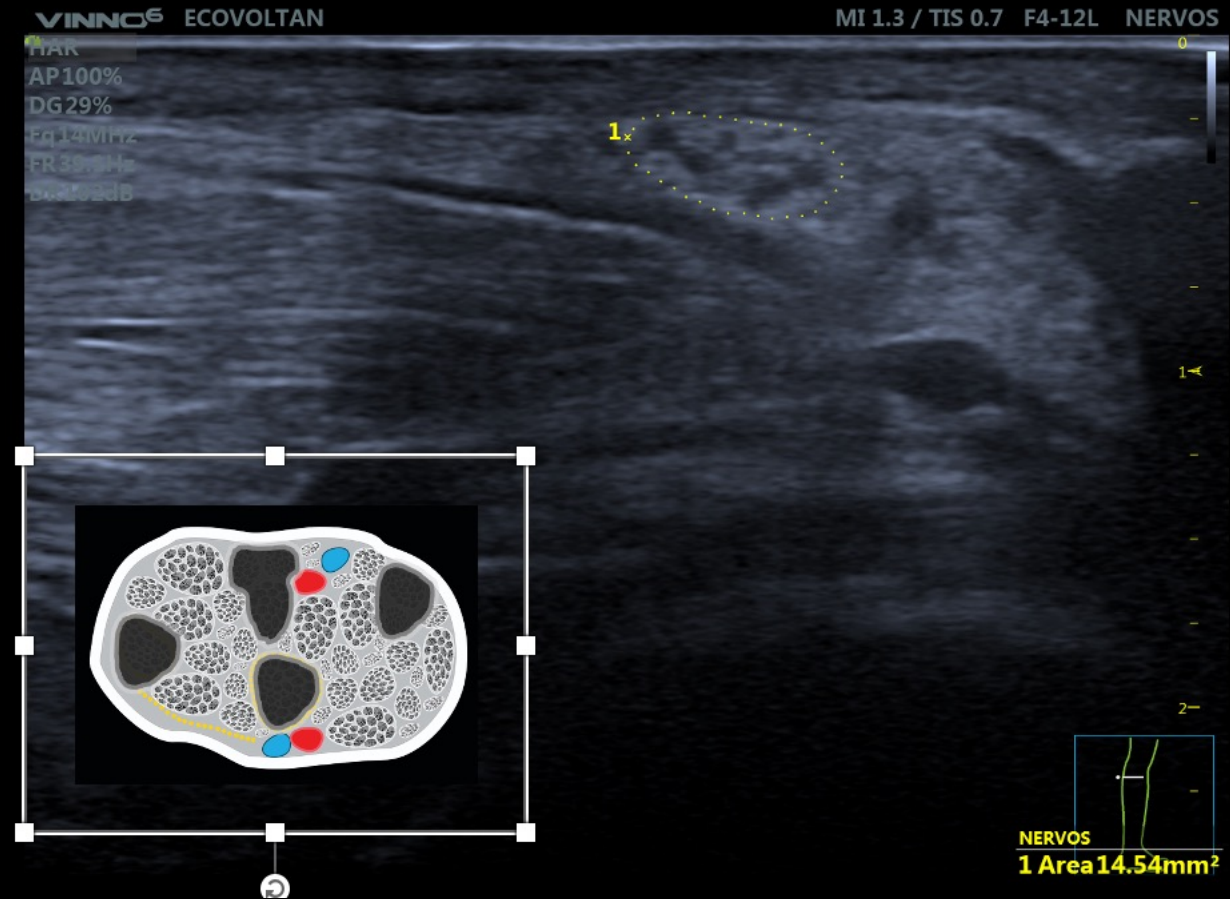

Pattern D or Focal fascicle distension (CSA < VR + 2 SD)

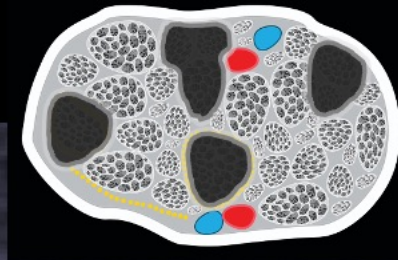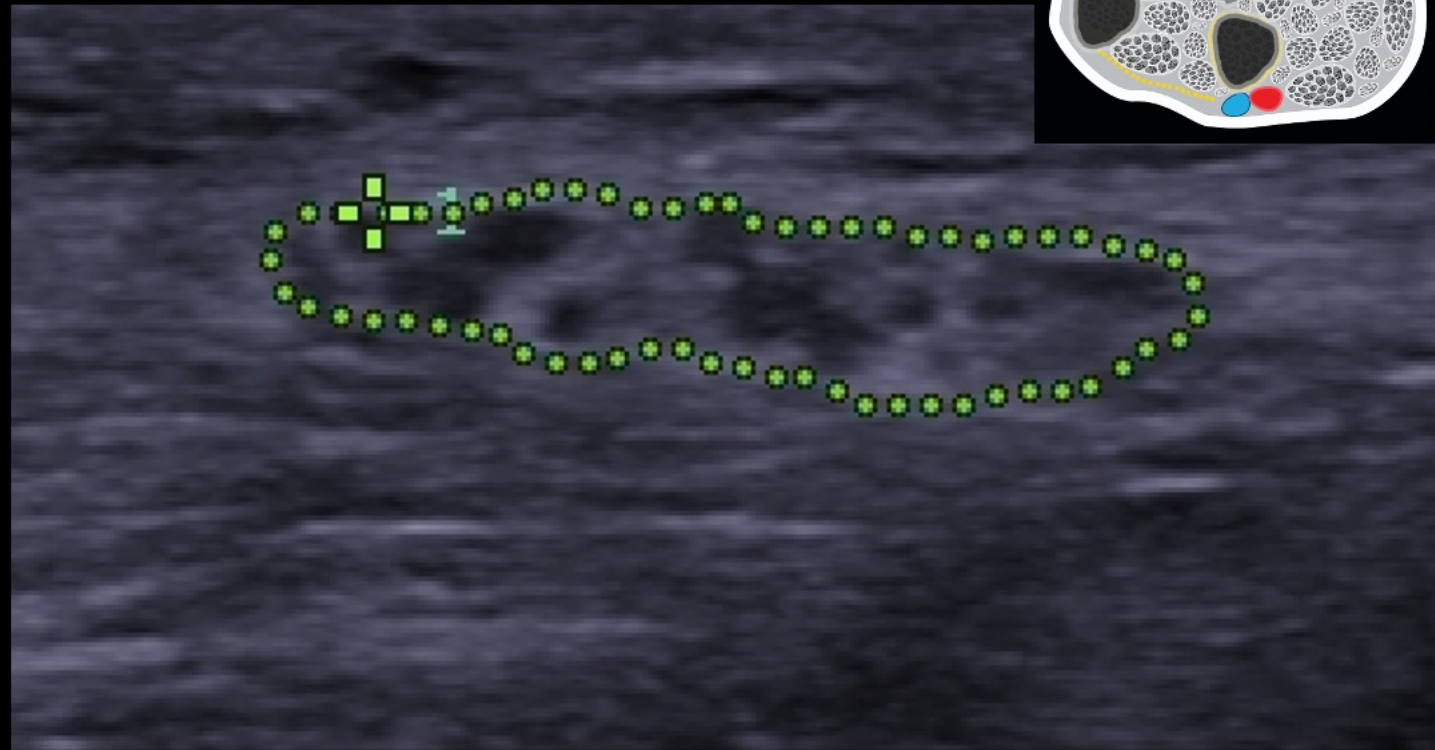

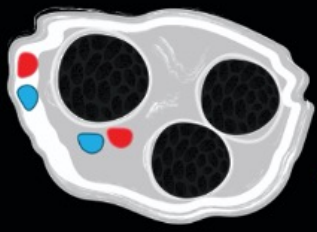

# Pattern F or Heterogeneous CSA < RV + 2SD

Transversal View

Longitudinal View

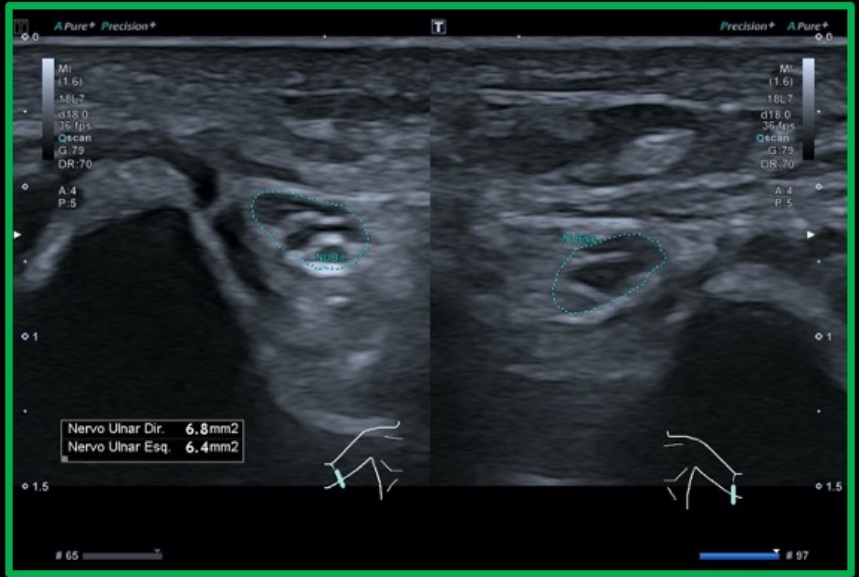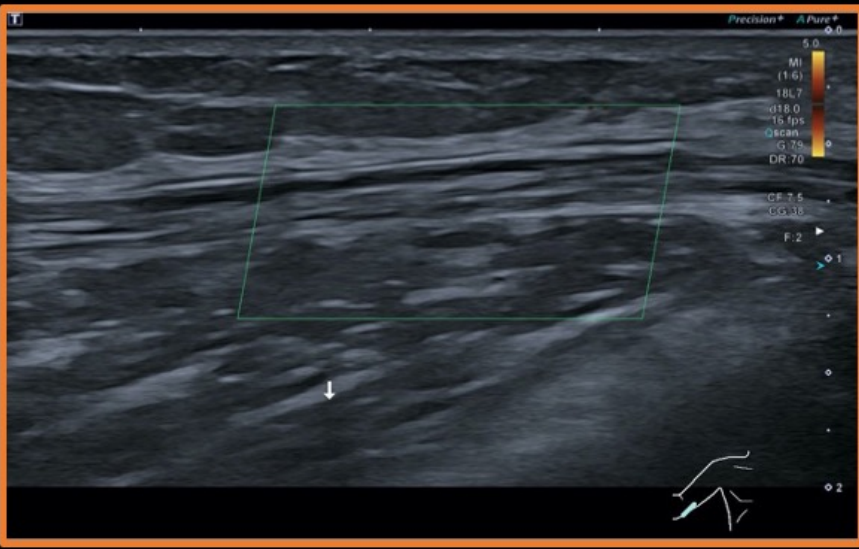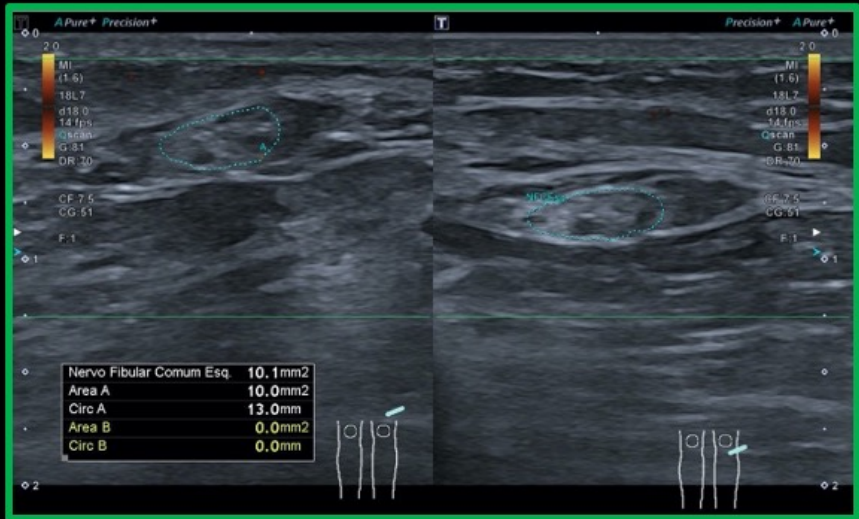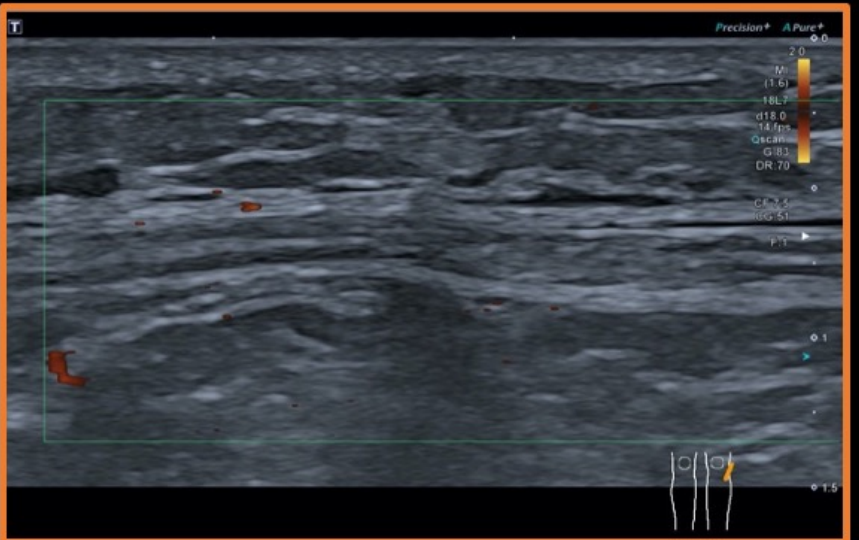



# Pattern B + D or Thickened + Focal Distention

VINNO<sup>6</sup>

MI 1.3 / TIS 2.0 F4-12L MuscSkel

HAR

AP100%

DG18%

Fq8MHz

FR19.0Hz

DR88dB

PDI

AP100%

DG61%

Fq6.3MHz

PR0.5kHz

WF35.0Hz

-1

Transversal View

Longitudinal View

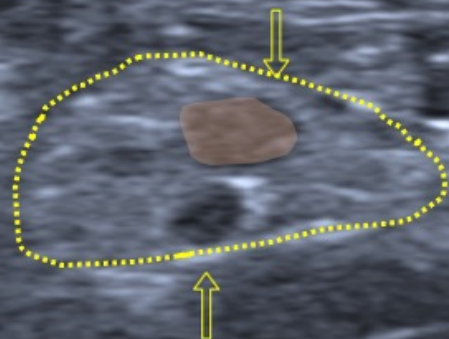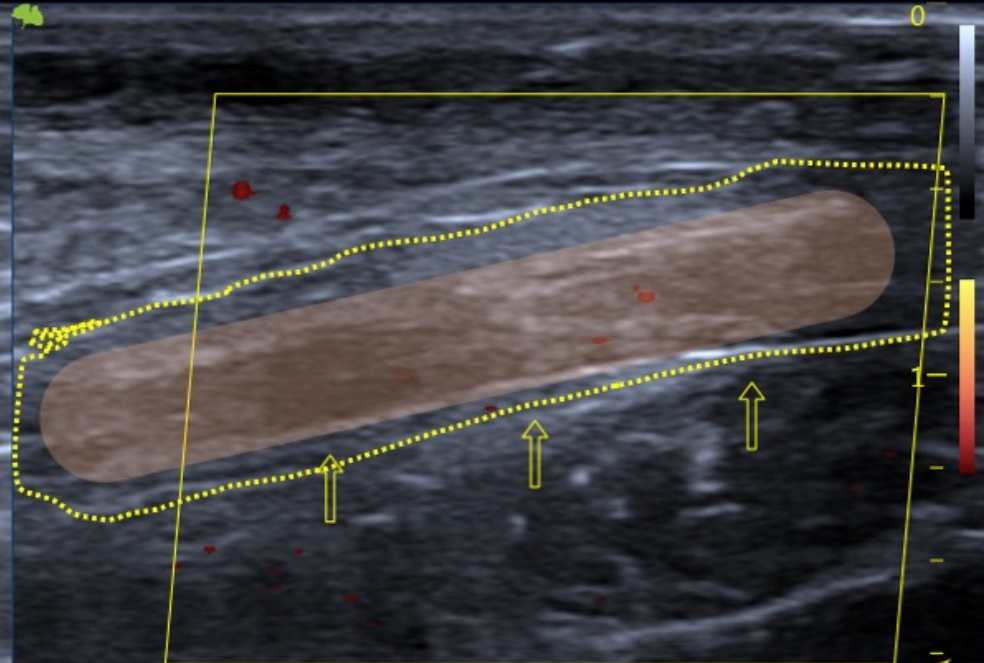

Communis fibularis nervus

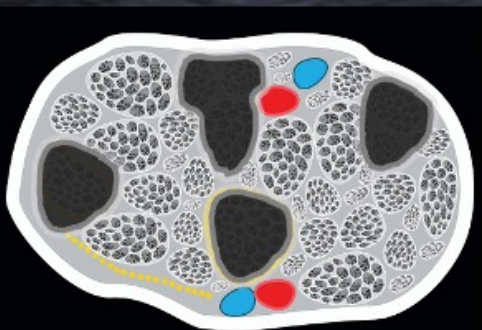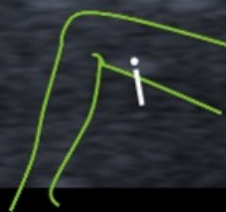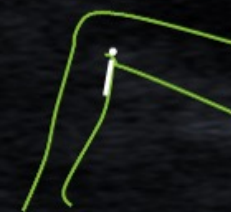

# Pattern B + D + F or Thickened + Focal Distention + Heterogeneous

VINNO<sup>6</sup> ECOVOLTAN

MI 1.3 / TIS 0.7 F4-12L NERVOS

HAR  
AP100%  
DG24%  
Fq14MHz  
FR39.1Hz  
DR102dB

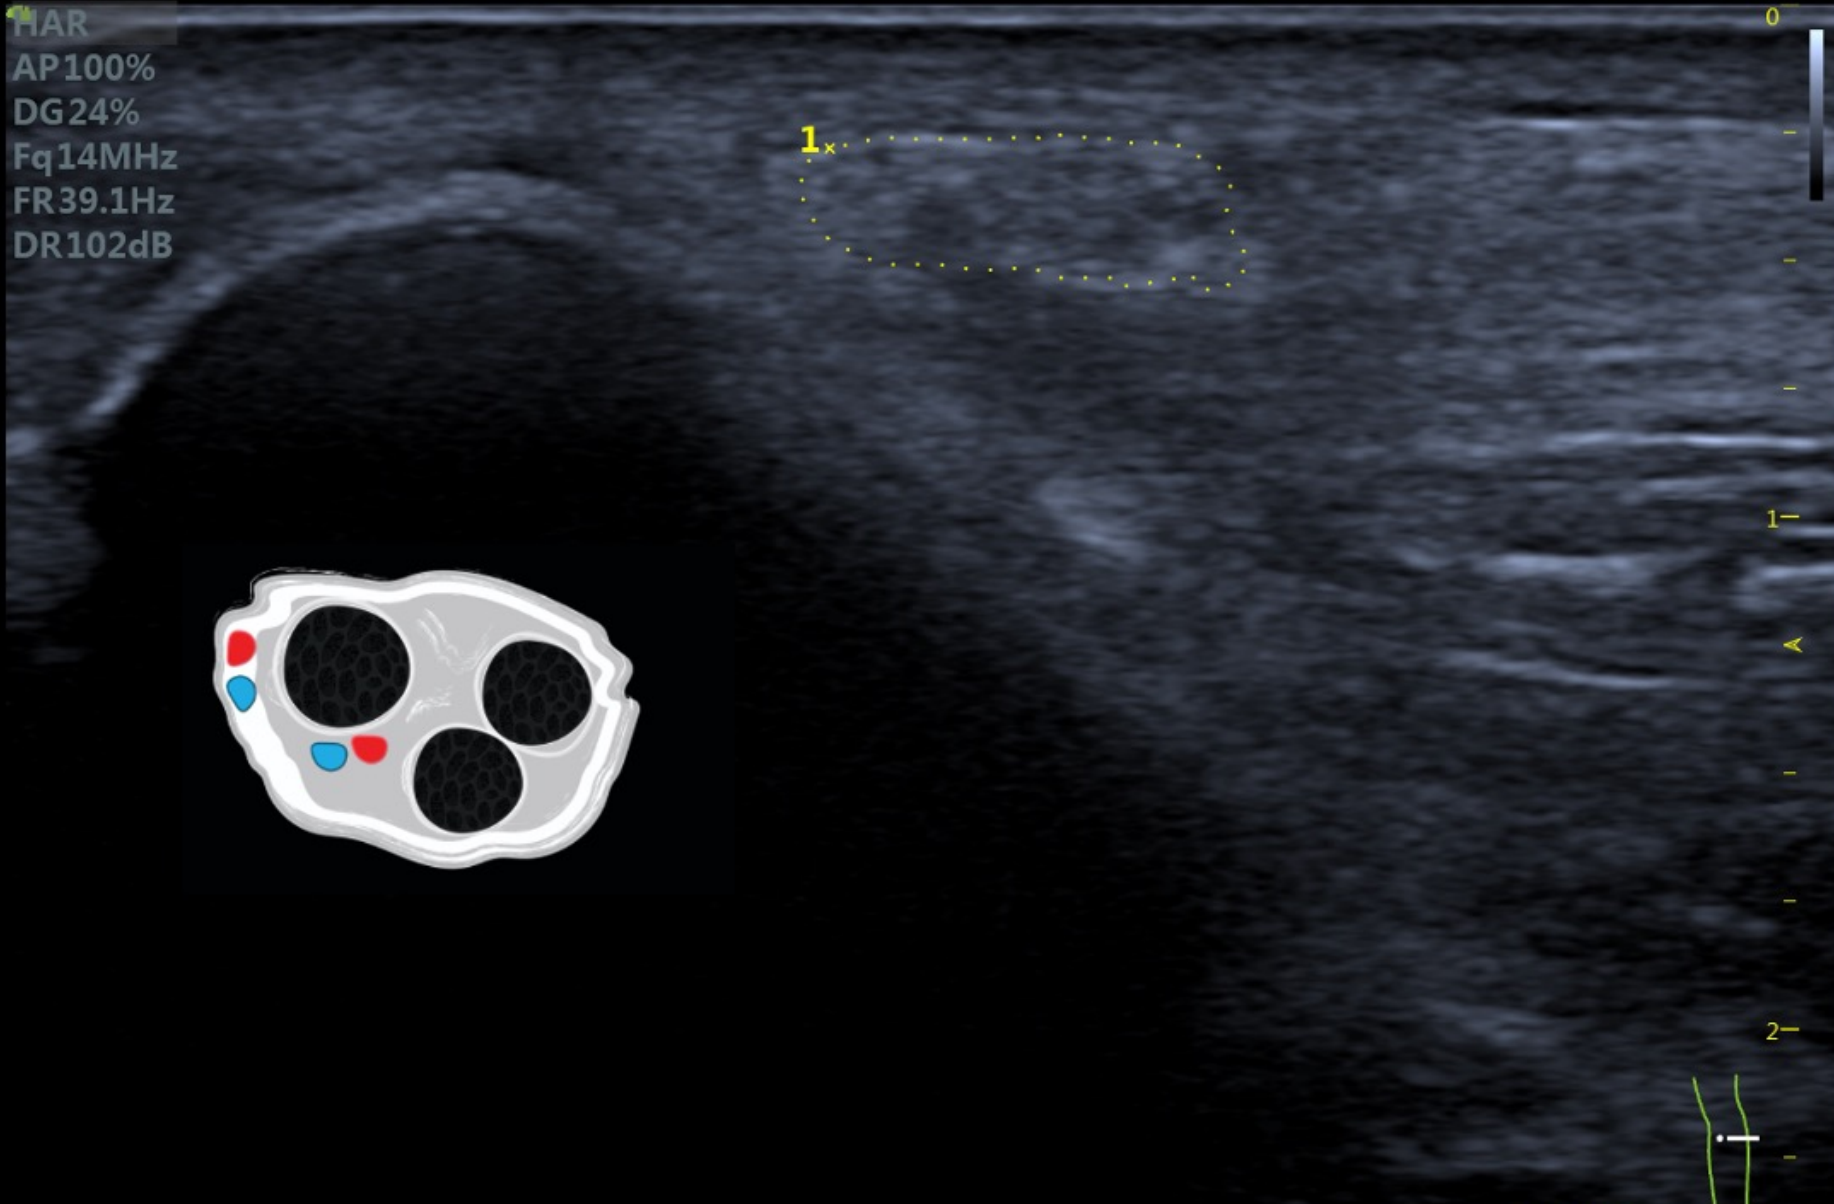

NERVOS  
1 Area 20.60mm<sup>2</sup>

# Intraneural focality (yellow): Scollard pattern modified by Voltan, G and Frade, MAC.

D pattern or Focal fascicle distention

Pattern A or Honeycombs

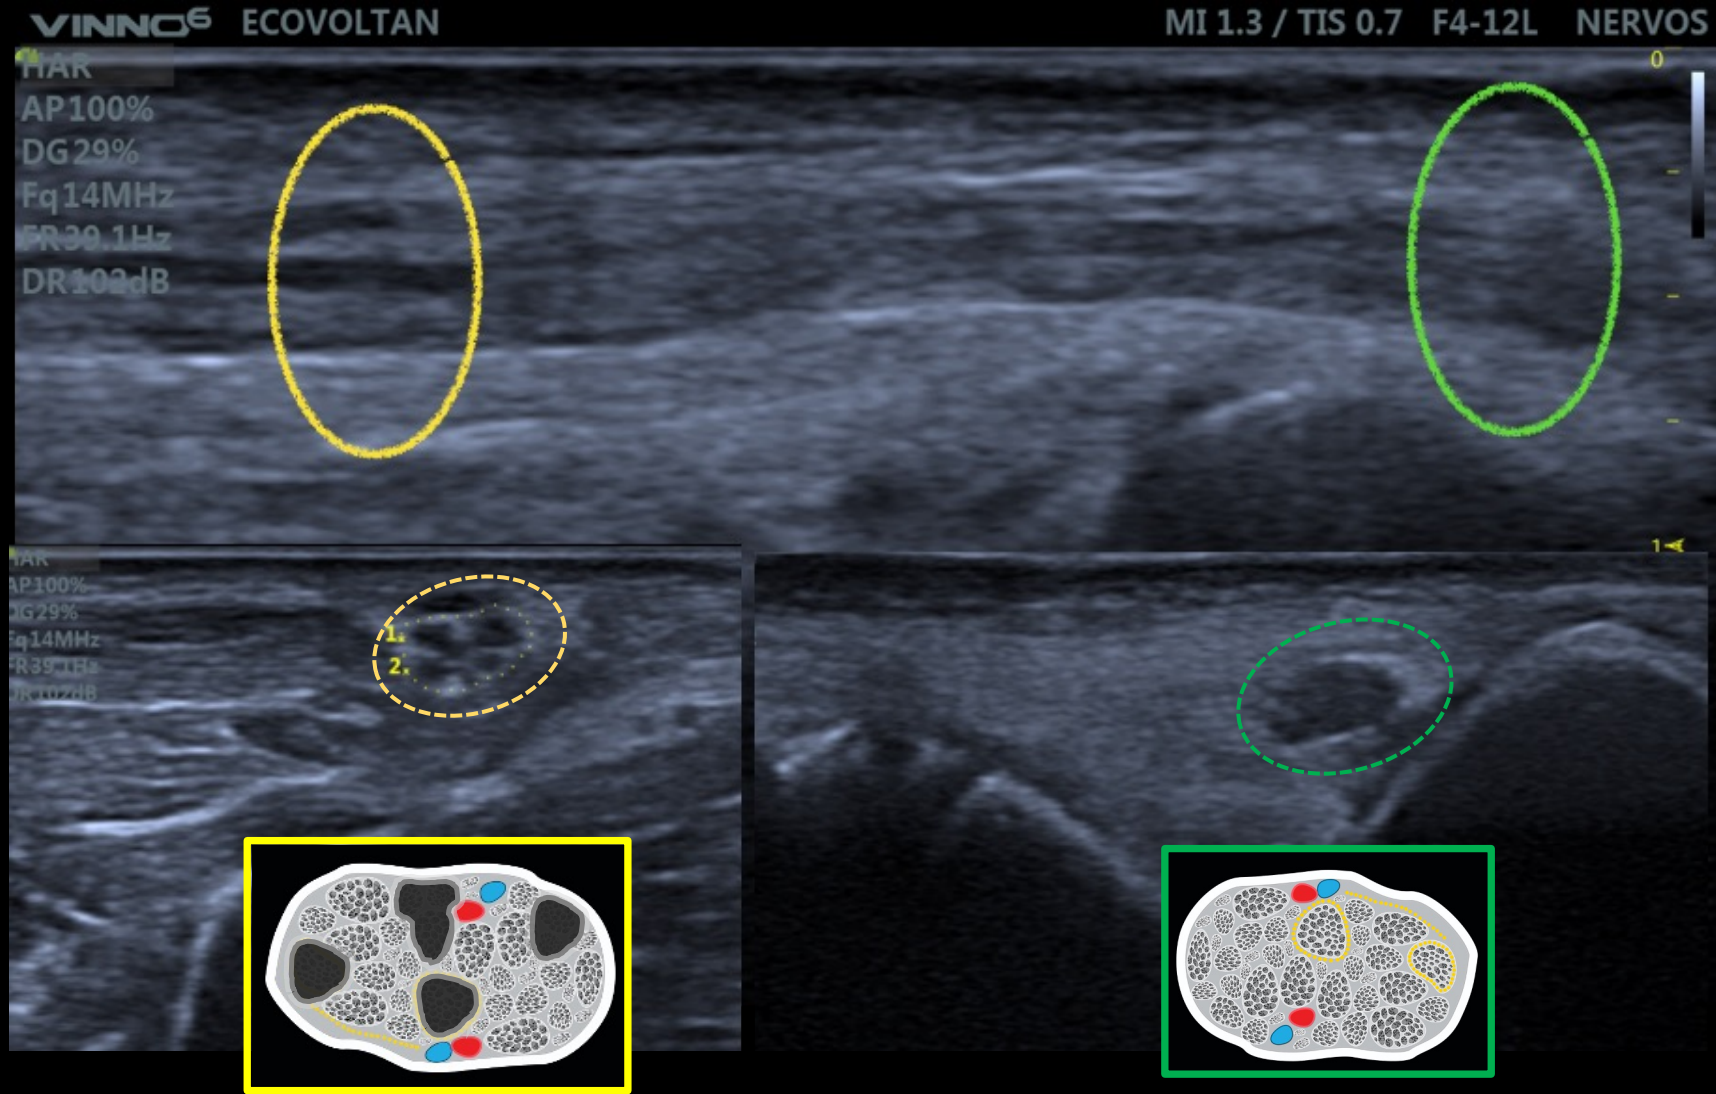

# Intraneural focality (yellow): Scollard pattern modified by Voltan, G and Frade, MAC. ©

Pattern B or Thickened

D pattern or Focal fascicle distention

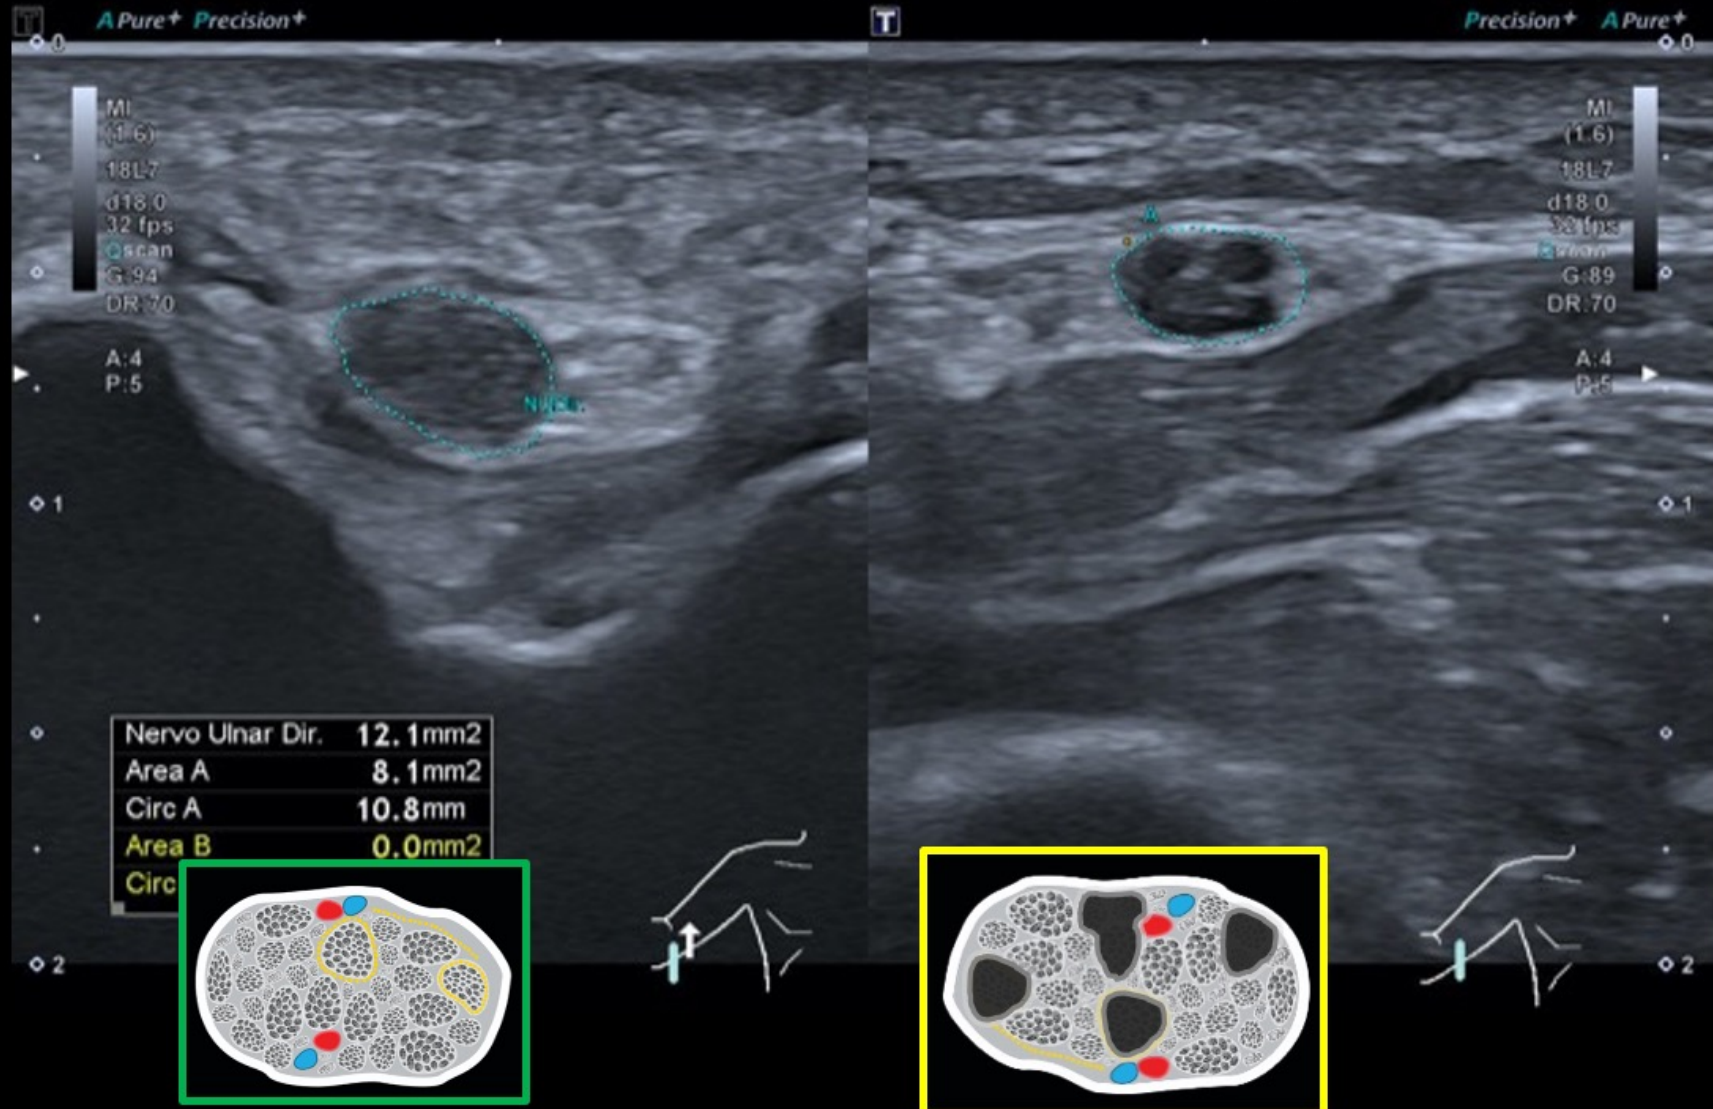

Supplement: Data_Sheet_1.pdf [file Data_Sheet_1.pdf]
